# Supplementary material
Source: PubMed Central journal article supplement (PMC3078630)
Supplement: NIHMS261888-supplement-1_si_001.pdf [file NIHMS261888-supplement-1_si_001.pdf]

# Supporting Information

**Noninvasive MRI-SERS imaging in living mice using an innately bimodal  
nanomaterial**

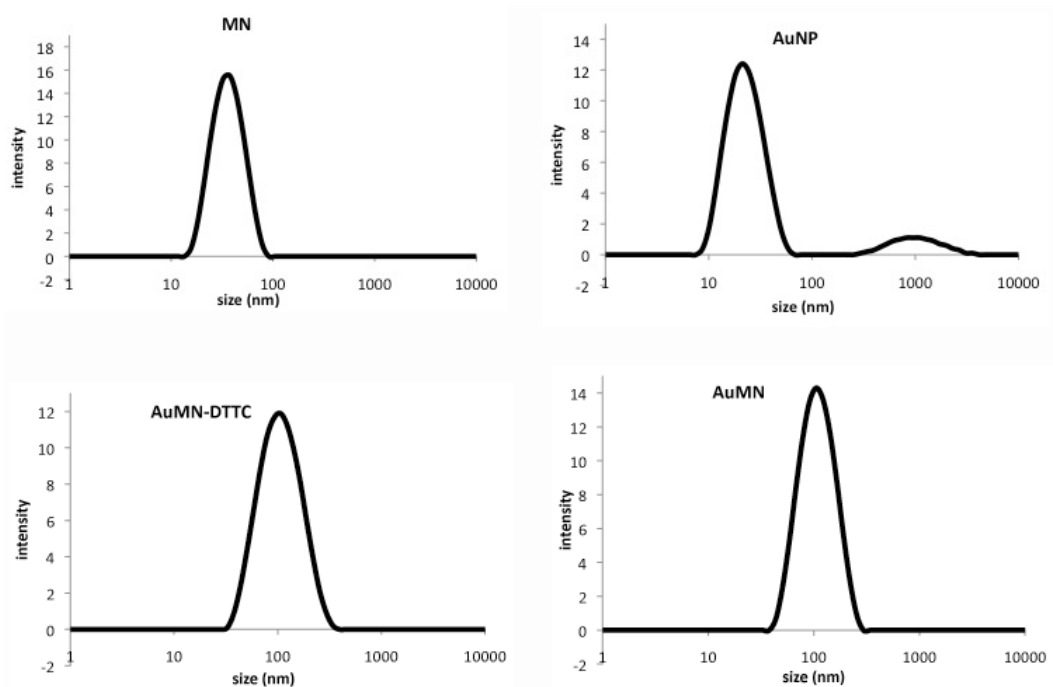

**Supplemental Figure 1:** Z-Average diameter of nanoparticles measured by dynamic light scattering. The particle size histograms of MN, AuNP, AuMN-DTTC and AuMN demonstrate that the final preparations were monodisperse.

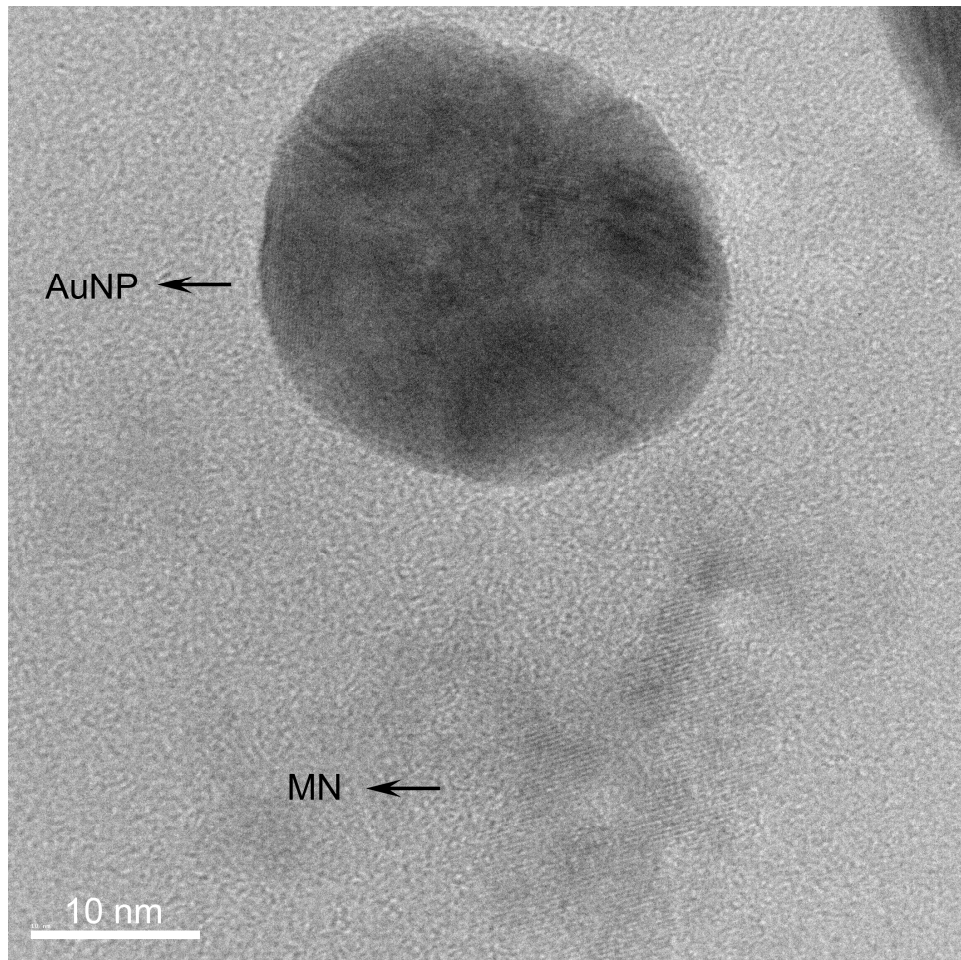

**Supplemental Figure 2:** HRTEM images show that the metallic lattices of AuNP and dextran coated MN are located close to each other. Scale bar, 10 nm.

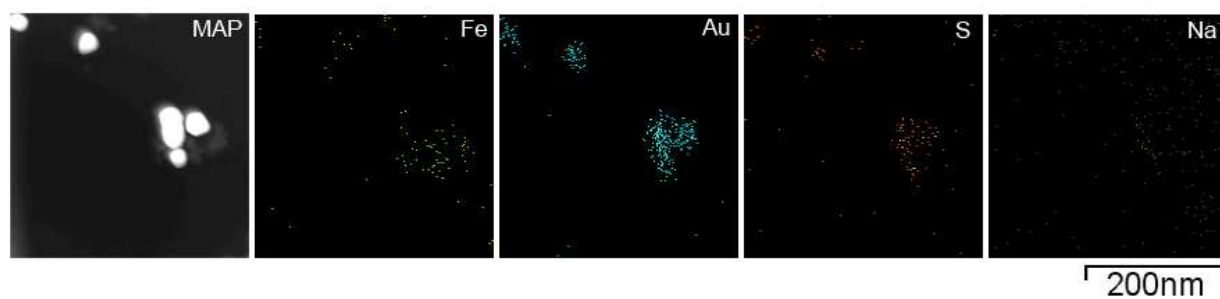

**Supplemental Figure 3:** Elemental map of AuMN-DTTC using STEM/EDS system. The Fe/Au/S elemental map co-localizes with the AuMN-DTTC map, as predicted. The sodium map demonstrates that the Fe/Au/S elemental co-localization is unique to AuMN-DTTC, since it is not observed with respect to sodium.
